# Supplementary material
Source: Springer Nature journal article supplement (https://www.springermedizin.de/resource/supplementary/12936_2006_276_MOESM2_ESM.pdf/9547362)

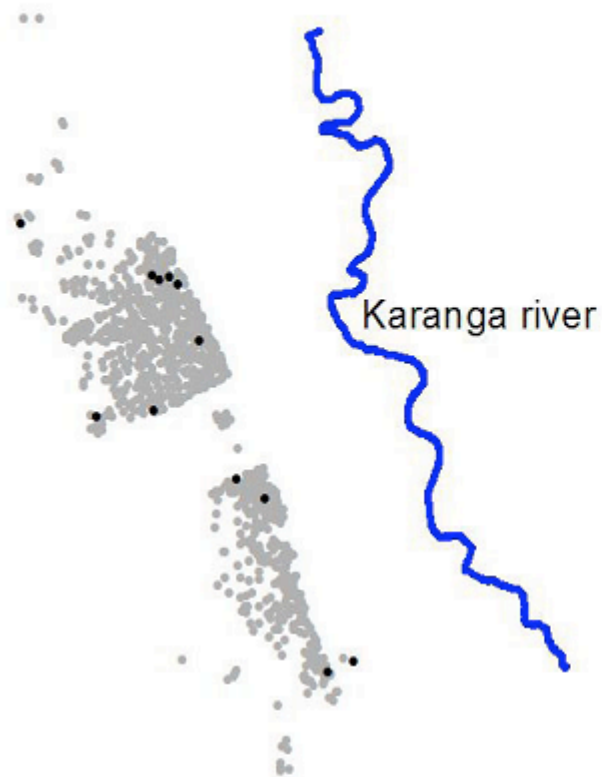

A. Malaria cases in dry season

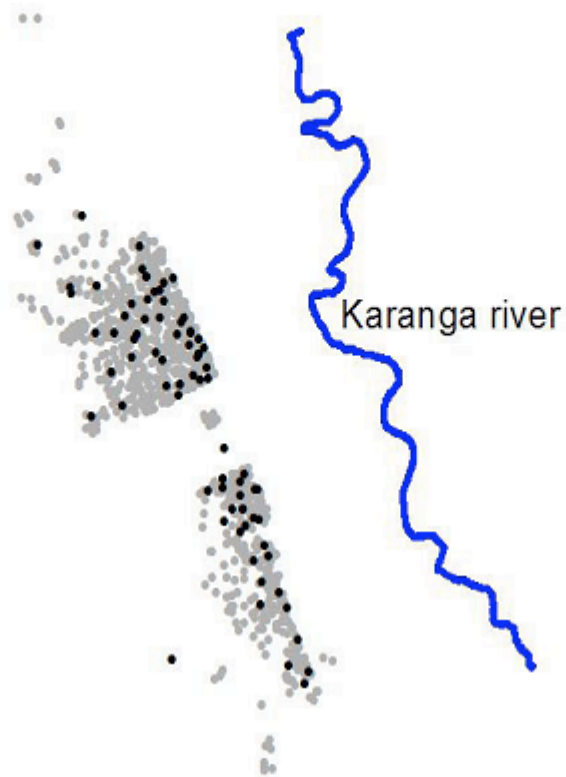

B. Malaria cases in wet season

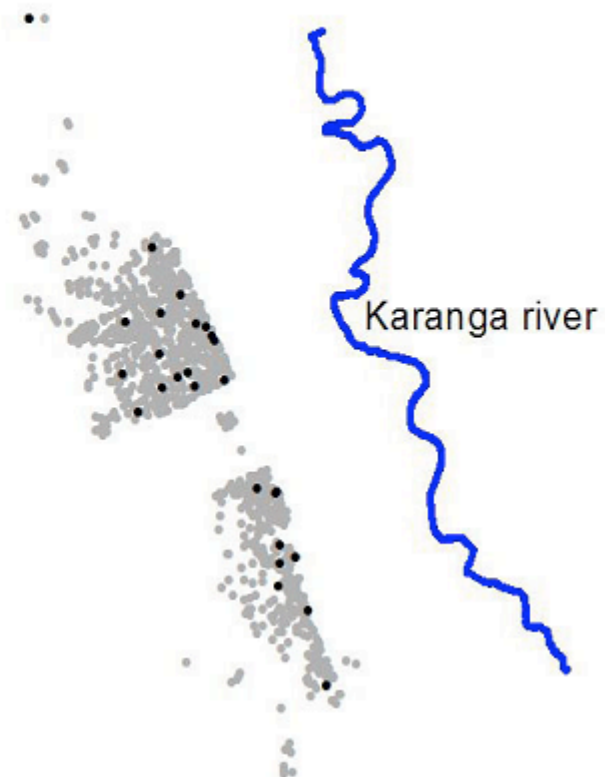

C. Malaria cases in cool season

Supplement: MOESM2 [file 9547362]
